# Supplementary material for: A new practical synthesis of triaryl and trisindolylmethanes under solvent-free reaction conditions
Source: Royal Society of Chemistry journal article supplement (doi:10.1039/c1ob06280h), 2011-01-01
Supplement: c1ob06280h.pdf [file c1ob06280h.pdf]

## Electronic Supplementary Information for

# A new practical synthesis of triaryl and trisindolylmethanes under solvent-free reaction conditions

Margherita Barbero,\* Silvano Cadamuro, Stefano Dughera, Claudio Magistris and Paolo Venturello

Dipartimento di Chimica Generale e Chimica Organica, Università di Torino,  
Via P. Giuria 7, 10125 Torino, Italy

[margherita.barbero@unito.it](mailto:margherita.barbero@unito.it)

Fax: +39-011-6707642; Tel: +39-011-6707645

### Table of contents:

|                                                                                                  |         |
|--------------------------------------------------------------------------------------------------|---------|
| General Experimental                                                                             | P 1     |
| General procedure for acid-catalysed triarylmethane synthesis                                    | P 2     |
| Characterisation of products <b>5a–i</b> , <b>6a–c</b> , <b>7a–b</b> , <b>8a–c</b> and <b>9a</b> | P 2–9   |
| General procedure for triarylmethane synthesis in the absence of catalyst                        | P 9     |
| Characterisation of product <b>5j</b>                                                            | P 9     |
| General procedure for acid-catalysed trisindolylmethane synthesis                                | P 9     |
| Characterisation of products <b>11a–d</b>                                                        | P 10–11 |

### General Information

All the reactions were run in vials using analytical grade reagents, and were monitored by TLC, GC, GC-MS and NMR spectrometry. GC-MS spectra were recorded with an AT5973N mass selective detector connected to an AT6890N GC cross-linked methyl silicone capillary column. <sup>1</sup>H NMR and <sup>13</sup>C NMR spectra were recorded in CDCl<sub>3</sub> with a Bruker Avance 200 spectrometer at 200 MHz and 50 MHz, respectively; chemical shifts are given in ppm relative to CDCl<sub>3</sub>. TLC were performed on Fluka silica gel TLCPET foils GF 254, 2–25 μm, layer thickness 0.2 mm, medium pore diameter 60 Å. Plates were visualized using UV light (254 nm). Column chromatography was carried out on SiO<sub>2</sub> (pore size 70 Å, 70–230 mesh). Petroleum ether refers to the fraction boiling in the range 40–60 °C and is abbreviated as PE. Commercially available reagents and solvents were purchased from Aldrich and were used without purification or distillation prior to use; Dowex 50X8 ion-exchange resin was purchased from Fluka. *o*-Benzenedisulfonimide (**1**) was prepared as described in literature.<sup>1</sup> Details for the reactions and yields for the pure (GC, GC-MS, TLC, <sup>1</sup>H NMR) isolated products are listed in Table 2, 4 and 5. Structure and purity of all the products were confirmed by comparison of their physical and spectral data (IR, MS, <sup>1</sup>H NMR and <sup>13</sup>C NMR) with those reported in literature. For triarylmethanes **5d–e**, **6b** and **8b**, <sup>1</sup>H NMR spectra are reported for the *p,p* isomer, always predominant, along with distinctive signals for the *o,p* minor isomer. By the work-up of the reaction mixtures, *o*-benzenedisulfonimide could be recovered by evaporating aqueous phases, purified by elution on Dowex ion-exchange resin and recycled in other reactions. When OBS was used adsorbed onto SiO<sub>2</sub>, at the end of the reaction, the solid mixture was extracted with small portions of CH<sub>2</sub>Cl<sub>2</sub> (6 x 3 mL) under stirring; the heterogeneous catalyst was then directly recycled after drying under vacuum.

<sup>1</sup> M. Barbero, M. Crisma, I. Degani, R. Fochi and P. Perracino, *Synthesis*, 1998, 1171.

## General Procedures

### Preparation of 10% w/w silica-gel supported *o*-benzenedisulfonimide:

To a solution of *o*-benzenedisulfonimide (**1**) (0.66 g, 3 mmol) in water (10 mL), silica gel (column chromatographic grade, 70 Å, 70-230 mesh; 6.60 g) was added. The mixture was stirred for 5 min and then water was evaporated under heating at reduced pressure until a free-flowing white solid was obtained. The catalyst was ready to use.

### General procedure for acid catalysed Friedel-Crafts hydroxyalkylation reactions:

A mixture of aldehyde **2** (1.0 mmol), aromatic compound **4** (mmol as in Table 4) and *o*-benzenedisulfonimide (**1**, 10 mol%, 0.022 g) was stirred at r.t. (or under heating, as in Table 4) in a vial until TLC analyses showed almost complete conversion of **2**. The reaction mixture was then treated with CH<sub>2</sub>Cl<sub>2</sub>-H<sub>2</sub>O (1:1, 20 mL). The aqueous phase was extracted with CH<sub>2</sub>Cl<sub>2</sub> (2 x 20 mL). The organic extracts were dried with Na<sub>2</sub>SO<sub>4</sub> and concentrated under reduced pressure. The crude residue was purified by column chromatography on a short column of silica gel.

When 10% w/w silica-gel supported *o*-benzenedisulfonimide was used as the catalyst, at the end of the reaction, after extraction of the solid phase with CH<sub>2</sub>Cl<sub>2</sub> (3 mL) and further few washings with small amounts of solvent (6 x 3 mL), the solid catalyst was dried and immediately recycled.

Organic extracts were dried with Na<sub>2</sub>SO<sub>4</sub> and the work-up was as above.

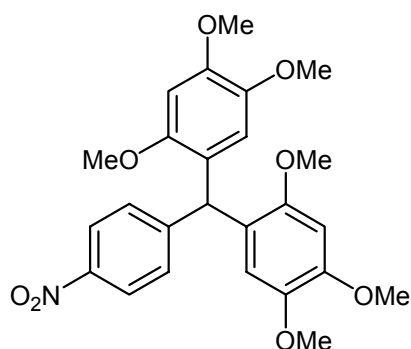

### bis(2,4,5-Trimethoxyphenyl)(4-nitrophenyl)methane (**5a**).<sup>2</sup>

Chromatographic eluent: PE-AcOEt (6:4); yellow solid (0.47 g, quantitative yield); mp 125–126 °C (EtOH) [lit.<sup>2</sup> 123–124 °C].

<sup>1</sup>H NMR (200 MHz, CDCl<sub>3</sub>): δ = 3.58 (s, 6H), 3.61 (s, 6H), 3.83 (s, 6H), 6.04 (s, 1H), 6.32 (s, 2H), 6.49 (s, 2H), 7.13 (d, *J* = 9.0 Hz, 2H), 8.03 (d, *J* = 8.8 Hz, 2H); <sup>13</sup>C NMR (50 MHz, CDCl<sub>3</sub>): δ = 42.8, 55.9 (2C), 56.4 (2C), 56.5 (2C), 97.8 (2C), 114.2 (2C), 122.1 (2C), 123.0 (2C), 129.4 (2C), 142.6 (2C), 145.9, 148.4 (2C), 151.3 (2C), 152.7.

MS (EI): *m/z* (%) 469 [M<sup>+</sup>](100), 438 (40), 181 (25), 151 (25).

<sup>2</sup> Y. Leng, F. Chen, L. Zuo and W. Duan, *Tetrahedron Lett.*, **2010**, *51*, 2370

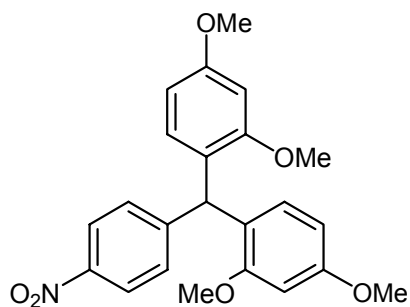

**bis(2,4-Dimethoxyphenyl)(4-nitrophenyl)methane (5b).<sup>2</sup>**

Chromatographic eluent: PE–AcOEt (7:3); light yellow solid (0.41 g, quantitative yield); mp 151.8–152.4 °C (CH<sub>2</sub>Cl<sub>2</sub>–PE) [lit.<sup>2</sup> 148–149 °C].

<sup>1</sup>H NMR (200 MHz, CDCl<sub>3</sub>): δ = 3.62 (s, 6H), 3.73 (s, 6H), 5.99 (s, 1H), 6.32 (dd, *J* = 8.4 and 2.4 Hz, 2H), 6.41 (d, *J* = 2.4 Hz, 2H), 6.58 (d, *J* = 8.4 Hz, 2H), 7.12 (d, *J* = 8.8 Hz, 2H), 8.02 (d, *J* = 8.8 Hz, 2H); <sup>13</sup>C NMR (50 MHz, CDCl<sub>3</sub>): δ = 42.3, 55.1 (2C), 55.4 (2C), 98.6 (2C), 103.5 (2C), 123.0 (2C), 123.2 (2C), 129.5 (2C), 130.1 (2C), 145.9, 153.1 (2C), 157.8 (2C), 159.5.

MS (EI): *m/z* (%) 409 [M<sup>+</sup>](100), 378 (40), 287 (50), 234 (40).

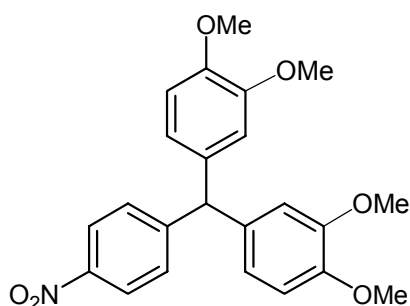

**bis(3,4-Dimethoxyphenyl)(4-nitrophenyl)methane (5c).<sup>3</sup>**

Chromatographic eluent: PE–AcOEt (6:4); light yellow oil (0.39 g, 95% yield).

<sup>1</sup>H NMR (200 MHz, CDCl<sub>3</sub>): δ = 3.70 (s, 6H), 3.80 (s, 6H), 5.46 (s, 1H), 6.50 (dd, *J* = 8.2 and 2.0 Hz, 2H), 6.57 (d, *J* = 2.0 Hz, 2H), 6.74 (d, *J* = 8.2 Hz, 2H), 7.22 (d, *J* = 8.8 Hz, 2H), 8.08 (d, *J* = 8.8 Hz, 2H); <sup>13</sup>C NMR (50 MHz, CDCl<sub>3</sub>): δ 55.5, 55.7 (4C), 110.8 (2C), 112.3 (2C), 121.2 (2C), 123.3 (2C), 129.9 (2C), 134.8 (2C), 146.3, 147.7 (2C), 148.8 (2C), 151.9.

MS (EI): *m/z* (%) 409 [M<sup>+</sup>](100), 378 (70), 287 (45).

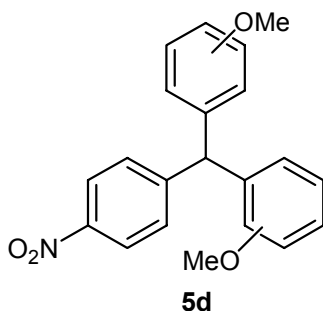

**bis(4-Methoxyphenyl)(4-nitrophenyl)methane (5d) and isomer.<sup>2</sup>**

<sup>3</sup> S. Podder, J. Choudhury, U. K. Roy and S. Roy, *J. Org. Chem.*, **2007**, *72*, 3100.

Chromatographic eluent: PE–AcOEt (7:3); light yellow oil (0.32 g, 91% yield). Mixture of isomers (*p,p* and *o,p*, the former always prevalent) not completely separable.

$^1\text{H NMR}$  (200 MHz,  $\text{CDCl}_3$ ):  $\delta$  = 3.66 (s, 3H) (*o,p*), 3.74 (s, 6H) (*p,p*), 3.76 (s, 3H) (*o,p*), 5.49 (s, 1H) (*p,p*), 5.87 (s, 1H) (*o,p*), 6.80 (d,  $J$  = 8.8 Hz, 4H), 6.95 (d,  $J$  = 8.8 Hz, 4H), 7.22 (d,  $J$  = 8.6 Hz, 2H), 8.07 (d,  $J$  = 8.8 Hz, 2H).

MS (EI):  $m/z$  (%) 349 [ $\text{M}^+$ ](100), 318 (65), 227 (100) (*p,p* isomer); 349 [ $\text{M}^+$ ](100), 319 (40), 227 (55), 121 (55) (*o,p* isomer).

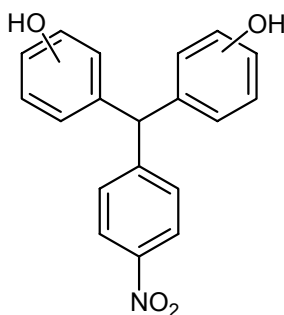

#### **bis(4-Hydroxyphenyl)(4-nitrophenyl)methane (5e) and isomer.<sup>2</sup>**

Chromatographic eluent: PE–EE (1:1); oil (0.32 g, quantitative yield). Mixture of isomers (*p,p* and *o,p*, the former always prevalent) not completely separable.

$^1\text{H NMR}$  (200 MHz,  $\text{CD}_3\text{OD}$ ):  $\delta$  = 5.42 (s, 1H) (*p,p*), 5.82 (s, 1H) (*o,p*), 6.64 (d,  $J$  = 8.6 Hz, 4H), 6.81 (d,  $J$  = 8.6 Hz, 4H), 7.19 (d,  $J$  = 8.8 Hz, 2H), 8.01 (d,  $J$  = 8.8 Hz, 2H).

MS (EI):  $m/z$  (%) 321 [ $\text{M}^+$ ](100), 228 (30), 199 (80) (*p,p* isomer); 321 [ $\text{M}^+$ ](100), 228 (100), 199 (50), 181 (60) (*o,p* isomer).

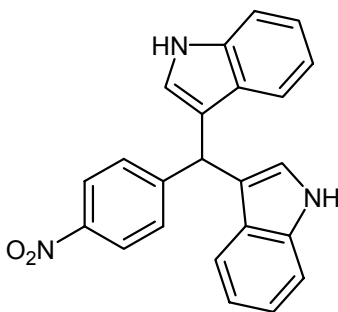

#### **bis(3-Indolyl)(4-nitrophenyl)methane (5f).<sup>4</sup>**

Chromatographic eluent: PE– $\text{CH}_2\text{Cl}_2$  (2:8); yellow needles (0.35 g, 95% yield); mp 221.9–222.3 °C (AcOEt–PE) [lit.<sup>4</sup> 218–220 °C].

$^1\text{H NMR}$  (200 MHz,  $\text{CD}_3\text{CN}$ ):  $\delta$  = 6.00 (s, 1H), 6.75 (d,  $J$  = 2.4 Hz, 2H), 6.88 (t,  $J$  = 7.5 Hz, 2H), 7.06 (t,  $J$  = 7.6 Hz, 2H), 7.24 (d,  $J$  = 7.8 Hz, 2H), 7.35 (d,  $J$  = 8.2 Hz, 2H), 7.50 (d,  $J$  = 8.8 Hz, 2H), 8.06 (d,  $J$  = 8.8 Hz, 2H), 9.10 (br s, 2H);  $^{13}\text{C NMR}$  (50 MHz,  $\text{CDCl}_3$ ):  $\delta$  = 40.0, 111.1 (2C), 117.9 (2C), 119.3 (2C), 119.4 (2C), 122.2 (2C), 123.4 (4C), 126.4 (2C), 129.3 (2C), 136.5 (2C), 146.4, 151.6.

<sup>4</sup> K. Rad-Moghadam and M. Sharifi-Kiasaraie, *Tetrahedron*, **2009**, *65*, 8816

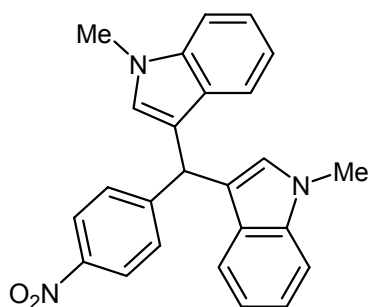

**bis(1-Methyl-3-indolyl)(4-nitrophenyl)methane (5g).**<sup>5</sup>

Chromatographic eluent: PE-CH<sub>2</sub>Cl<sub>2</sub> (4:6); yellow needles (0.39 g, 99% yield); mp 210.0–211.0 °C (CH<sub>2</sub>Cl<sub>2</sub>-PE) [lit.<sup>5</sup> 215–217 °C].

<sup>1</sup>H NMR (200 MHz, CD<sub>3</sub>CN): δ = 3.65 (s, 6H), 5.93 (s, 1 H), 6.50 (s, 2H), 6.92–7.02 (m, 2H), 7.14–7.35 (m, 6H), 7.45 (d, *J* = 8.6 Hz, 2H), 8.08 (d, *J* = 8.8 Hz, 2H); <sup>13</sup>C NMR (50 MHz, CDCl<sub>3</sub>): δ = 32.6, 39.9, 109.2 (2C), 116.4 (2C), 118.9 (2C), 119.5 (2C), 121.7 (2C), 123.4 (2C), 126.9 (2C), 128.1 (2C), 129.3 (2C), 137.3 (2C), 146.3, 152.2.

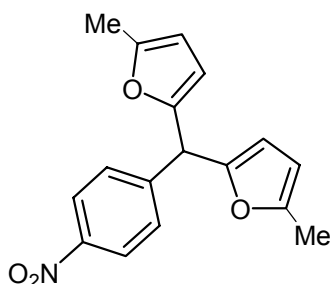

**bis(5-Methyl-2-furyl)(4-nitrophenyl)methane (5h).**<sup>6</sup>

Chromatographic eluent: PE-EE (7:3); white needles (0.39 g, 95% yield); mp 81.7–82.7 °C (CH<sub>2</sub>Cl<sub>2</sub>-PE) [lit.<sup>6</sup> 89–91 °C].

<sup>1</sup>H NMR (200 MHz, CDCl<sub>3</sub>): δ = 2.19 (s, 6H), 5.37 (s, 1H), 5.84–5.89 (m, 4H), 7.35 (d, *J* = 8.8 Hz, 2H), 8.11 (d, *J* = 8.6 Hz, 2H); <sup>13</sup>C NMR (50 MHz, CDCl<sub>3</sub>): δ = 13.37 (2C), 44.63, 106.1 (2C), 108.6 (2C), 123.5 (2C), 129.1 (2C), 146.8, 147.3, 150.8 (2C), 151.9 (2C).

MS (EI): *m/z* (%) 297 [M<sup>+</sup>](90), 175 (100).

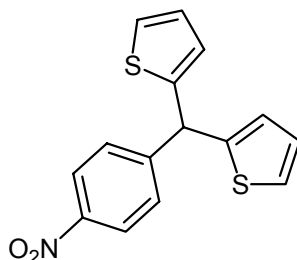

**bis(2-Thienyl)(4-nitrophenyl)methane (5i).**<sup>3</sup>

Chromatographic eluent: PE-EE (7:3); pink needles (0.22 g, 74% yield); mp 81.7.8–82.7.4 °C (CH<sub>2</sub>Cl<sub>2</sub>-PE) [lit.<sup>3</sup> 89–91 °C];

<sup>5</sup> B.-S. Liao, J.-T. Chen and S.-T. Liu, *Synthesis*, **2007**, 3125

<sup>6</sup> S. Ch. Gagieva, T. A. Sukhova, D. V. Savinov, V. A. Tuskaev, K. A. Lyssenko, N. M. Bravaya, Yu. N. Belokon and B. M. Bulychev, *Russ. Chem. Bull. Int. Ed.*, **2006**, *55*, 1794

$^1\text{H}$  NMR (200 MHz,  $\text{CDCl}_3$ ):  $\delta$  = 5.92 (s, 1H), 5.75–5.79 (m, 2H), 6.88–6.95 (m, 2H), 7.18–7.22 (m, 2H), 7.40 (d,  $J$  = 9.0 Hz, 2H), 8.12 (d,  $J$  = 9.0 Hz, 2H);  $^{13}\text{C}$  NMR (50 MHz,  $\text{CDCl}_3$ ):  $\delta$  = 46.9, 123.7 (2C), 125.2 (2C), 126.4 (2C), 126.7 (2C), 129.1 (2C), 145.4 (2C), 146.8, 150.6.  
MS (EI):  $m/z$  (%) 301 [ $\text{M}^+$ ](100), 179 (40).

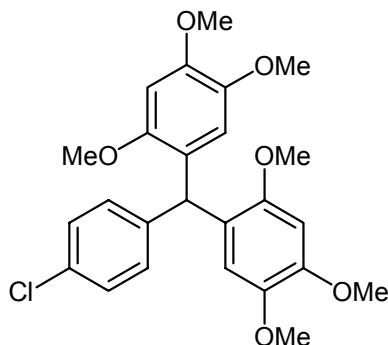

**(4-Chlorophenyl)bis(2,4,5-trimethoxyphenyl)methane (6a).<sup>7</sup>**

Chromatographic eluent: PE–AcOEt (6:4); white needles (0.46 g, 90% yield); mp 167.8–168.2 °C ( $\text{CH}_2\text{Cl}_2$ –PE) [lit.<sup>7</sup> 168–169 °C].

$^1\text{H}$  NMR (200 MHz,  $\text{CDCl}_3$ ):  $\delta$  = 3.57 (s, 6H), 3.60 (s, 6H), 3.81 (s, 6H), 5.96 (s, 1H), 6.33 (s, 2H), 6.47 (s, 2H), 6.91 (d,  $J$  = 8.6 Hz, 2H), 7.13 (d,  $J$  = 8.4 Hz, 2H);  $^{13}\text{C}$  NMR (50 MHz,  $\text{CDCl}_3$ ):  $\delta$  = 41.9, 55.9 (2C), 56.5 (2C), 56.7 (2C), 98.0 (2C), 114.2 (2C), 123.6 (2C), 127.9 (2C), 130.1 (2C), 131.2, 142.5 (2C), 142.8, 148.0 (2C), 151.3 (2C).

MS (EI):  $m/z$  (%) 458 [ $\text{M}^+$ ](100), 427 (55).

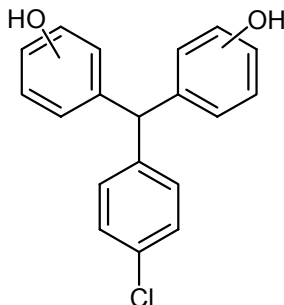

**(4-Chlorophenyl)bis(4-hydroxyphenyl)methane (6b) and isomer.<sup>8</sup>**

Chromatographic eluent: PE–AcOEt (6:4); viscous oil (0.24 g, 77% yield). Mixture of isomers ( $p,p$  and  $o,p$ , the former always prevalent) not completely separable.

$^1\text{H}$  NMR (200 MHz,  $\text{CD}_3\text{OD}$ ):  $\delta$  = 5.25 (s, 1H) ( $p,p$ ), 5.71 (s, 1H) ( $o,p$ ), 6.63 (d,  $J$  = 8.6 Hz, 4H), 6.79 (d,  $J$  = 8.4 Hz, 4H), 6.94 (d,  $J$  = 8.4 Hz, 2H), 7.13 (d,  $J$  = 8.6 Hz, 2H).

MS (EI):  $m/z$  (%) 310 [ $\text{M}^+$ ](100), 275 (40), 217 (40), 199 (70), 181 (80) ( $p,p$  isomer); 310 [ $\text{M}^+$ ](40), 181 (100), 275 (30), 217 (35) ( $o,p$  isomer).

<sup>7</sup> P. Thirupathi and S. S. Kim, *J. Org. Chem.*, **2010**, *75*, 5240.

<sup>8</sup> N. Mibu, K. Yokomizo, M. Uyeda and K. Sumoto, *Chem. Pharm. Bull.*, **2003**, *51*, 1325.

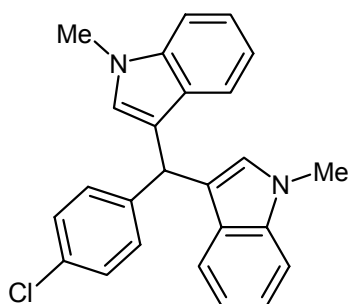

**(4-Chlorophenyl)bis(1-methyl-3-indolyl)methane (6c).**<sup>9</sup>

Chromatographic eluent: PE–CH<sub>2</sub>Cl<sub>2</sub> (4:6); white solid (0.38 g, quantitative yield); mp 206–207 (CH<sub>2</sub>Cl<sub>2</sub>–PE) [lit.<sup>9</sup> 208–209 °C].

<sup>1</sup>H NMR (200 MHz, CD<sub>3</sub>CN): δ = 3.64 (s, 6H), 5.83 (s, 1H), 6.49 (s, 2H), 6.95–7.02 (m, 2H), 7.14–7.35 (m, 10H); <sup>13</sup>C NMR (50 MHz, CDCl<sub>3</sub>): δ = 32.5 (2C), 39.3, 109.0 (2C), 117.6 (2C), 118.6 (2C), 119.8 (2C), 121.4 (2C), 127.1 (2C), 128.1 (2C), 128.2, (2C) 129.9 (2C), 131.4, 137.3 (2C), 142.9.

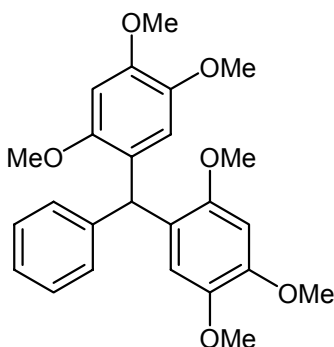

**bis(2,4,5-Trimethoxyphenyl)phenylmethane (7a).**<sup>7</sup>

Chromatographic eluent: PE–AcOEt (7:3); white solid (0.39 g, 93% yield); mp 129.9–130.5 °C (CH<sub>2</sub>Cl<sub>2</sub>–PE) [lit.<sup>7</sup> 126–127 °C].

<sup>1</sup>H NMR (200 MHz, CDCl<sub>3</sub>): δ = 3.57 (s, 6H), 3.60 (s, 6H), 3.82 (s, 6H), 6.02 (s, 1H), 6.37 (s, 2H), 6.48 (s, 2H), 6.95–7.05 (m, 2H), 7.10–7.22 (m, 3H); <sup>13</sup>C NMR (50 MHz, CDCl<sub>3</sub>): δ = 42.3, 55.9 (2C), 56.4 (2C), 56.8 (2C), 98.2 (2C), 114.3 (2C), 124.3 (2C), 125.6, 127.8 (2C), 128.8 (2C), 142.5 (2C), 144.1, 147.8 (2C), 151.4 (2C).

MS (EI): *m/z* (%) 424 [M<sup>+</sup>] (100), 393 (50).

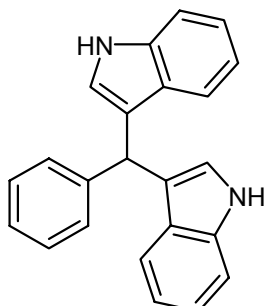

**bis(3-Indolyl)phenylmethane (7b).**<sup>7</sup>

<sup>9</sup> J.-T. Li, M.-X. Sun, G.-Y. He and X.-Y. Xu, *Ultrason. Sonochem.*, **2011**, *18*, 412.

Chromatographic eluent: PE–AcOEt (8:2); light yellow solid (0.41 g, 75% yield); mp 110–112 °C (CH<sub>2</sub>Cl<sub>2</sub>–PE) [lit.<sup>7</sup> 141–142 °C].

<sup>1</sup>H NMR (200 MHz, CDCl<sub>3</sub>): δ = 5.84 (s, 1H), 6.57 (d, *J* = 3.2 Hz, 2H), 6.90–7.00 (m, 2H), 7.05–7.38 (m, 11H), 7.77 (br s, 2H); <sup>13</sup>C NMR (50 MHz, CDCl<sub>3</sub>): δ = 40.0, 110.9 (2C), 119.0 (2C), 119.5 (2C), 119.8 (2C), 121.7 (2C), 123.4 (2C), 126.0, 126.9 (2C), 128.0 (2C), 128.5 (2C), 136.5 (2C), 143.8.

MS (EI): *m/z* (%) 322 [M<sup>+</sup>] (100), 245 (60).

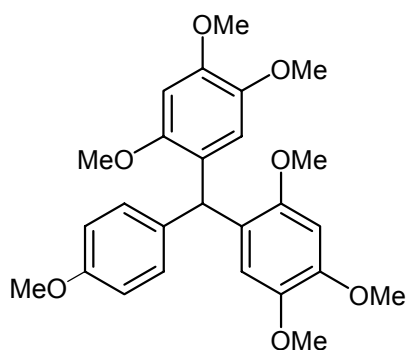

**bis(2,4,5-Trimethoxyphenyl)(4-methoxyphenyl)methane (8a).**<sup>7</sup>

Chromatographic eluent: PE–AcOEt (6:4); white solid (0.40 g, 91% yield); mp 129.9–130.2 °C (CH<sub>2</sub>Cl<sub>2</sub>–PE) [lit.<sup>7</sup> 131 °C];

<sup>1</sup>H NMR (200 MHz, CDCl<sub>3</sub>): δ = 3.58 (s, 6H), 3.60 (s, 6H), 3.71 (s, 3H), 3.81 (s, 6H), 5.96 (s, 1H), 6.36 (s, 2H), 6.47 (s, 2H), 6.72 (d, *J* = 8.8 Hz, 2H), 6.90 (d, *J* = 8.8 Hz, 2H); <sup>13</sup>C NMR (50 MHz, CDCl<sub>3</sub>): δ = 41.5, 55.0, 55.9 (2C), 56.5 (2C), 56.9 (2C), 98.3 (2C), 113.2 (2C), 114.3 (2C), 124.8 (2C), 129.7 (2C), 136.1, 142.5 (2C), 147.7 (2C), 151.3 (2C), 157.4.

MS (EI): *m/z* (%) 454 [M<sup>+</sup>] (100), 423 (9).

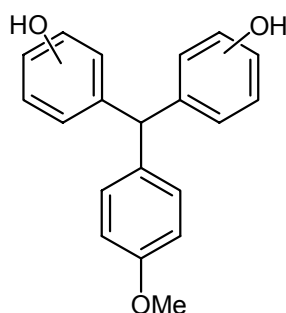

**bis(4-Hydroxyphenyl)(4-methoxyphenyl)methane (8b) and isomer.**<sup>10</sup>

Chromatographic eluent: PE–AcOEt (6:4); oil (0.25 g, 82% yield). Mixture of isomers (*p,p* and *o,p*, the former always prevalent) not completely separable.

<sup>1</sup>H NMR (200 MHz, CD<sub>3</sub>OD): δ = 3.67 (s, 3H), 5.23 (s, 1H) (*p,p*), 5.68 (s, 1H) (*o,p*), 6.53–6.92 (m, 12H).

MS (EI): *m/z* (%) 306 [M<sup>+</sup>] (100), 275 (40), 213 (60), 197 (45) (*p,p* isomer); 306 [M<sup>+</sup>] (75), 213 (40), 197 (100), 181 (80) (*o,p* isomer).

<sup>10</sup> N. Mibu and K. Sumoto, *Chem. Pharm. Bull.*, **2000**, *48*, 1810.



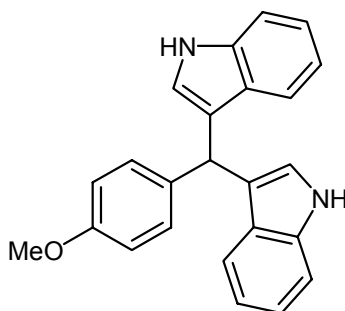

**bis(3-Indolyl)(4-methoxyphenyl)methane (8c).<sup>7</sup>**

Chromatographic eluent: PE–AcOEt (6:4); brown solid (0.31 g, 89% yield); mp 195.5–196.5 °C (CH<sub>2</sub>Cl<sub>2</sub>–PE) [lit.<sup>7</sup> 187 °C].

<sup>1</sup>H NMR (200 MHz, CDCl<sub>3</sub>): δ = 3.73 (s, 3H), 5.79 (s, 1H), 6.56 (d, *J* = 1.6 Hz, 2H), 6.77 (d, *J* = 8.6 Hz, 2H), 6.96 (t, *J* = 7.8 Hz, 2H), 7.05–7.23 (m, 4H), 7.28 (d, *J* = 8.0 Hz, 2H), 7.35 (d, *J* = 7.8 Hz, 2H), 7.76 (br s, 2H); <sup>13</sup>C NMR (50 MHz, CDCl<sub>3</sub>): δ = 39.1, 55.0, 110.8 (2C), 113.4 (2C), 119.0 (2C), 119.9 (4C), 121.7 (2C), 123.4 (2C), 126.9 (2C), 129.4 (2C), 136.0, 136.5 (2C), 157.7.

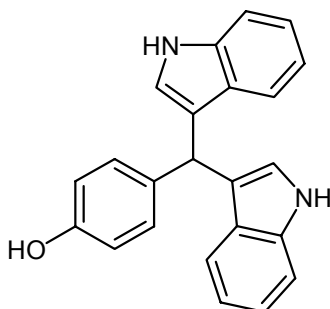

**(4-Hydroxyphenyl)bis(3-indolyl)methane (9a).<sup>11</sup>**

Chromatographic eluent: PE–AcOEt (4:6); red solid (0.25 g, 73% yield); mp 213–214 °C (CH<sub>2</sub>Cl<sub>2</sub>–PE) [lit.<sup>11</sup> 210–211 °C].

<sup>1</sup>H NMR (200 MHz, CD<sub>3</sub>CN): δ = 5.76 (s, 1H), 6.64–6.70 (m, 4H), 6.82–6.91 (m, 2H), 6.99–7.14 (m, 4H), 7.24–7.35 (m, 4H), 8.99 (br s, 2H); <sup>13</sup>C NMR (50 MHz, CD<sub>3</sub>CN): δ = 38.9, 111.4 (2C), 114.6 (2C), 118.4 (2C), 119.2 (4C), 121.2 (2C), 123.3 (2C), 126.8 (2C), 129.3 (2C), 136.0, 136.7 (2C), 154.9.

**General procedure for Friedel-Crafts hydroxyalkylation in the absence of catalyst:**

A mixture of aldehyde **2a** (1.0 mmol) and aromatic compound **4** (2 mmol) was stirred under heating at 100 °C in a vial until TLC analyses showed almost complete conversion of the starting reagents. The reaction mixture was then treated with CH<sub>2</sub>Cl<sub>2</sub>–H<sub>2</sub>O (1:1, 20 mL). The aqueous phase was extracted with CH<sub>2</sub>Cl<sub>2</sub> (2 x 20 mL). The organic extracts were dried with Na<sub>2</sub>SO<sub>4</sub> and concentrated under reduced pressure. The crude residue was purified by column chromatography on a short column of silica gel. Details are reported in Table 4.

<sup>11</sup> H. Firouzabadi, N. Iranpoor and A. A. Jafari, *J. Mol. Catal. A: Chem.*, **2006**, *244*, 168.

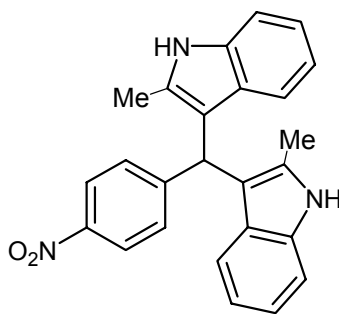

**bis(2-Methyl-3-indolyl)(4-nitrophenyl)methane (5j).**<sup>12</sup>

Chromatographic eluent: PE–AcOEt (4:6); yellow solid (0.38 g, quantitative yield); dp 239–242 °C (CH<sub>2</sub>Cl<sub>2</sub>–PE) [lit.<sup>12</sup> 241–243 °C].

<sup>1</sup>H NMR (200 MHz, CD<sub>3</sub>CN): δ = 2.05 (s, 6H), 6.06 (s, 1H), 6.69–6.81 (m, 4H), 6.88–6.96 (m, 2H), 7.23 (d, *J* = 8.0 Hz, 2H), 7.37 (d, *J* = 9.0 Hz, 2H), 8.05 (d, *J* = 9.0 Hz, 2H), 9.01 (br s, 2H); <sup>13</sup>C NMR (50 MHz, CD<sub>3</sub>CN): δ = 11.1 (2C), 38.9, 110.3 (2C), 111.2 (2C), 118.4 (2C), 118.5 (2C), 120.2 (2C), 123.0 (2C), 128.0 (2C), 129.6 (2C), 132.6 (2C), 135.2 (2C), 146.2, 152.5.

**General procedure for trisindolylmethane 11a–c synthesis:**

A mixture of 3-formylindole **2f** (0.15 g, 1.0 mmol), aromatic compound **4** (2.2 mmol) and *o*-benzenedisulfonimide (**1**, mol% as in Table 5) in EtOH (2 mL) was stirred at r.t. in a vial until TLC analyses showed almost complete conversion of **2f**. The reaction mixture was then treated with CH<sub>2</sub>Cl<sub>2</sub>–H<sub>2</sub>O (1:1, 20 mL). The aqueous phase was extracted with CH<sub>2</sub>Cl<sub>2</sub> (2 x 20 mL). The organic extracts were dried with Na<sub>2</sub>SO<sub>4</sub> and concentrated under reduced pressure. The crude residue was purified by column chromatography on a short column of silica gel; eluent: PE–AcOEt (6:4).

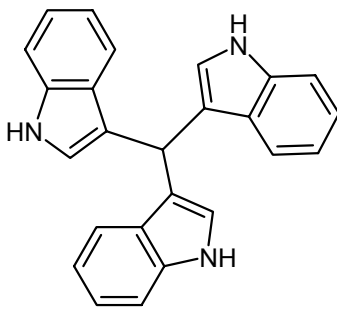

**Tris(3-indolyl)methane (11a).**<sup>13</sup>

Chromatographic eluent: PE–AcOEt (4:6); light orange solid (0.33 g, 92% yield); dp 229–234 °C (Acetone–PE) [lit.<sup>13</sup> 240 °C];

<sup>1</sup>H NMR (200 MHz, CD<sub>3</sub>CN): δ = 6.08 (m, 1H), 6.80–6.90 (m, 6H), 6.95–7.08 (m, 3H), 7.27–7.40 (m, 6H), 9.07 (br s, 3H); <sup>13</sup>C NMR (50 MHz, CD<sub>3</sub>CN): δ = 31.0, 111.1 (3C), 118.3 (3C), 118.7 (3C), 119.2 (3C), 121.1 (3C), 123.0 (3C), 126.8 (3C), 136.7 (3C).

<sup>12</sup> A. Hasaninejad, A. Zare, H. Sharghi, K. Niknam and M. Shekouhy, *Arkivoc*, **2007**, (xiv), 39.

<sup>13</sup> A. Hazra, P. Paira, K. B. Sahu, S. Banerjee and N. B. Mondal, *Catal. Commun.*, **2008**, *9*, 1681.

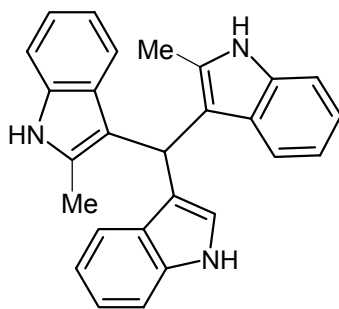

**Bis(2-methyl-3-indolyl)(3-indolyl)methane (11b).**<sup>13</sup>

Chromatographic eluent: PE–AcOEt (4:6); orange solid (0.28 g, 72% yield); dp 250–255 °C (Acetone–PE) [lit.<sup>13</sup> 260–262 °C].

<sup>1</sup>H NMR (200 MHz, DMSO-*d*<sub>6</sub>): δ = 2.04 (s, 6H), 5.96 (s, 1H), 6.50–6.67 (m, 3H), 6.69–6.87 (m, 3H), 6.90–7.00 (m, 3H), 7.05–7.15 (m, 3H), 7.25–7.30 (m, 1H), 10.57 (br s, 3H); <sup>13</sup>C NMR (50 MHz, DMSO-*d*<sub>6</sub>): δ = 12.1, 30.5, 110.4, 111.6, 112.9, 118.0, 118.3, 118.7, 119.2, 119.6, 121.1, 123.5, 127.5, 128.6, 131.5, 135.2, 136.8.

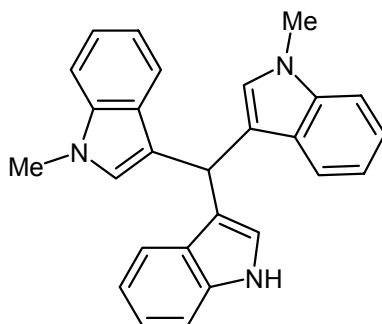

**Bis(1-methyl-3-indolyl)(3-indolyl)methane (11c).**<sup>14</sup>

Chromatographic eluent: PE–AcOEt (4:6); orange solid (0.35 g, 90% yield); dp 218–223 °C (CH<sub>2</sub>Cl<sub>2</sub>–PE) [lit.<sup>14</sup> 219–220 °C];

<sup>1</sup>H NMR (200 MHz, CDCl<sub>3</sub>): δ = 3.60 (s, 6H), 6.12 (s, 1H), 6.58 (s, 2H), 6.69 (d, *J* = 2.2 Hz, 1H), 6.90–7.00 (m, 3H), 7.11–7.31 (m, 6H), 7.43–7.48 (m, 3H), 7.76 (br s, 1H); <sup>13</sup>C NMR (50 MHz, CDCl<sub>3</sub>): δ = 30.1, 32.5, 108.8, 110.8, 117.8, 118.2, 118.8, 119.6, 120.0, 121.0, 121.5, 123.1, 127.0, 127.3, 127.8, 136.5, 137.2.

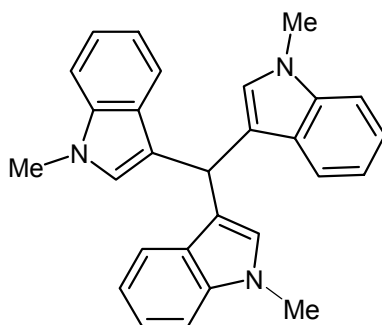

**Tris(1-methyl-3-indolyl)methane (11d).**<sup>13</sup>

<sup>14</sup> H. Koshima and W. Matsusaka, *J. Heterocycl. Chem.*, **2002**, *39*, 1089.

Title product was isolated when **2f** and 1-methylindole (**4g**) were reacted in the presence of OBS 10 mol%. The immediate formation of two products was observed: the expected TIM **11c** and the symmetric TIM **11d**. The reaction was heated to 50 °C and stopped after 24 h. After usual work-up and chromatographic purification, TIM **11d** was obtained as orange solid (0.16 g, 41% yield). GC and GC-MS analyses confirmed indole (**4f**) formation in the reaction mixture (MS (EI): *m/z* (%) 117 [ $M^+$ ] (100), 90 (45)).

Dp 244 °C (CH<sub>2</sub>Cl<sub>2</sub>-PE) [lit.<sup>13</sup> 255–257 °C].

<sup>1</sup>H NMR (200 MHz, CDCl<sub>3</sub>): δ = 3.60 (s, 9H), 6.09 (s, 1H), 6.57 (s, 3H), 6.93–6.99 (m, 3H), 7.13–7.22 (m, 6H), 7.40–7.48 (m, 3H); <sup>13</sup>C NMR (50 MHz, CDCl<sub>3</sub>): δ = 32.5, 108.8, 118.0, 118.2, 120.0, 121.0, 127.3, 127.8, 137.2.
